# Supplementary material
Source: MDPI journal article supplement (https://www.mdpi.com/2304-6740/5/3/60)

# checkCIF/PLATON report

You have not supplied any structure factors. As a result the full set of tests cannot be run.

THIS REPORT IS FOR GUIDANCE ONLY. IF USED AS PART OF A REVIEW PROCEDURE FOR PUBLICATION, IT SHOULD NOT REPLACE THE EXPERTISE OF AN EXPERIENCED CRYSTALLOGRAPHIC REFEREE.

No syntax errors found.      CIF dictionary      Interpreting this report

## Datablock: stock17

---

|                        |                                            |                                                 |
|------------------------|--------------------------------------------|-------------------------------------------------|
| Bond precision:        | C-C = 0.0109 Å                             | Wavelength=0.71073                              |
| Cell:                  | a=9.0934(12)                               | b=31.653(3)      c=16.281(2)                    |
|                        | alpha=90                                   | beta=136.39(3)      gamma=90                    |
| Temperature:           | 150 K                                      |                                                 |
|                        | Calculated                                 | Reported                                        |
| Volume                 | 3232.3(19)                                 | 3232.2(12)                                      |
| Space group            | P 21/c                                     | P 1 21/c 1                                      |
| Hall group             | -P 2ybc                                    | -P 2ybc                                         |
| Moiety formula         | 2(C21 H24 N9 P S Zn), 4(Cl O4), 3(C2 H3 N) | C21 H24 N9 P S Zn 2+, 2(Cl O4 1-), 1.5(C2 H3 N) |
| Sum formula            | C48 H57 Cl4 N21 O16 P2 S2 Zn2              | C24 H28.50 Cl2 N10.50 O8 P S Zn                 |
| Mr                     | 1582.79                                    | 791.37                                          |
| Dx, g cm <sup>-3</sup> | 1.626                                      | 1.626                                           |
| Z                      | 2                                          | 4                                               |
| Mu (mm <sup>-1</sup> ) | 1.104                                      | 1.104                                           |
| F000                   | 1620.0                                     | 1620.0                                          |
| F000'                  | 1623.78                                    |                                                 |
| h,k,lmax               | 11,39,20                                   | 11,38,20                                        |
| Nref                   | 6341                                       | 6322                                            |
| Tmin,Tmax              | 0.722,0.789                                | 0.703,0.834                                     |
| Tmin'                  | 0.606                                      |                                                 |

Correction method= # Reported T Limits: Tmin=0.703 Tmax=0.834  
AbsCorr = ANALYTICAL

Data completeness= 0.997      Theta(max)= 25.999

R(reflections)= 0.0699( 5266)      wR2(reflections)= 0.1680( 6322)

S = 1.109      Npar= 466

---

The following ALERTS were generated. Each ALERT has the format

**test-name\_ALERT\_alert-type\_alert-level.**

Click on the hyperlinks for more details of the test.

## ● Alert level C

PLAT341\_ALERT\_3\_C Low Bond Precision on C-C Bonds ..... 0.01087 Ang.

## ● Alert level G

|                   |                                                  |       |              |
|-------------------|--------------------------------------------------|-------|--------------|
| PLAT003_ALERT_2_G | Number of Uiso or Uij Restrained non-H Atoms ... | 9     | Report       |
| PLAT012_ALERT_1_G | No _shelx_res_checksum found in CIF .....        |       | Please Check |
| PLAT042_ALERT_1_G | Calc. and Reported MoietyFormula Strings Differ  |       | Please Check |
| PLAT045_ALERT_1_G | Calculated and Reported Z Differ by a Factor ... | 0.50  | Check        |
| PLAT083_ALERT_2_G | SHELXL Second Parameter in WGHT Unusually Large  | 12.71 | Why ?        |
| PLAT128_ALERT_4_G | Alternate Setting for Input Space Group P21/c    | P21/n | Note         |
| PLAT152_ALERT_1_G | The Supplied and Calc. Volume s.u. Differ by ... | 7     | Units        |
| PLAT178_ALERT_4_G | The CIF-Embedded .res File Contains SIMU Records | 3     | Report       |
| PLAT186_ALERT_4_G | The CIF-Embedded .res File Contains ISOR Records | 1     | Report       |
| PLAT187_ALERT_4_G | The CIF-Embedded .res File Contains RIGU Records | 3     | Report       |
| PLAT244_ALERT_4_G | Low 'Solvent' Ueq as Compared to Neighbors of    | C110  | Check        |
| PLAT244_ALERT_4_G | Low 'Solvent' Ueq as Compared to Neighbors of    | C120  | Check        |
| PLAT300_ALERT_4_G | Atom Site Occupancy of N30 is Constrained at     | 0.5   | Check        |
| PLAT300_ALERT_4_G | Atom Site Occupancy of C31 is Constrained at     | 0.5   | Check        |
| PLAT300_ALERT_4_G | Atom Site Occupancy of C32 is Constrained at     | 0.5   | Check        |
| PLAT300_ALERT_4_G | Atom Site Occupancy of H32A is Constrained at    | 0.5   | Check        |
| PLAT300_ALERT_4_G | Atom Site Occupancy of H32B is Constrained at    | 0.5   | Check        |
| PLAT300_ALERT_4_G | Atom Site Occupancy of H32C is Constrained at    | 0.5   | Check        |
| PLAT300_ALERT_4_G | Atom Site Occupancy of N40 is Constrained at     | 0.5   | Check        |
| PLAT300_ALERT_4_G | Atom Site Occupancy of C41 is Constrained at     | 0.5   | Check        |
| PLAT300_ALERT_4_G | Atom Site Occupancy of C42 is Constrained at     | 0.5   | Check        |
| PLAT300_ALERT_4_G | Atom Site Occupancy of H42A is Constrained at    | 0.5   | Check        |
| PLAT300_ALERT_4_G | Atom Site Occupancy of H42B is Constrained at    | 0.5   | Check        |
| PLAT300_ALERT_4_G | Atom Site Occupancy of H42C is Constrained at    | 0.5   | Check        |
| PLAT300_ALERT_4_G | Atom Site Occupancy of N50 is Constrained at     | 0.5   | Check        |
| PLAT300_ALERT_4_G | Atom Site Occupancy of C51 is Constrained at     | 0.5   | Check        |
| PLAT300_ALERT_4_G | Atom Site Occupancy of C52 is Constrained at     | 0.5   | Check        |
| PLAT300_ALERT_4_G | Atom Site Occupancy of H52A is Constrained at    | 0.5   | Check        |
| PLAT300_ALERT_4_G | Atom Site Occupancy of H52B is Constrained at    | 0.5   | Check        |
| PLAT300_ALERT_4_G | Atom Site Occupancy of H52C is Constrained at    | 0.5   | Check        |
| PLAT302_ALERT_4_G | Anion/Solvent/Minor-Residue Disorder (Resd 4)..  | 100 % | Note         |
| PLAT302_ALERT_4_G | Anion/Solvent/Minor-Residue Disorder (Resd 5)..  | 100 % | Note         |
| PLAT302_ALERT_4_G | Anion/Solvent/Minor-Residue Disorder (Resd 6)..  | 100 % | Note         |
| PLAT432_ALERT_2_G | Short Inter X...Y Contact O21 .. C52 ..          | 2.98  | Ang.         |
| PLAT432_ALERT_2_G | Short Inter X...Y Contact O23 .. C2 ..           | 2.95  | Ang.         |
| PLAT789_ALERT_4_G | Atoms with Negative _atom_site_disorder_group #  | 18    | Check        |
| PLAT790_ALERT_4_G | Centre of Gravity not Within Unit Cell: Resd. #  | 2     | Note         |
|                   | C1 O4                                            |       |              |
| PLAT790_ALERT_4_G | Centre of Gravity not Within Unit Cell: Resd. #  | 5     | Note         |
|                   | C2 H3 N                                          |       |              |
| PLAT790_ALERT_4_G | Centre of Gravity not Within Unit Cell: Resd. #  | 6     | Note         |
|                   | C2 H3 N                                          |       |              |
| PLAT860_ALERT_3_G | Number of Least-Squares Restraints .....         | 75    | Note         |
| PLAT933_ALERT_2_G | Number of OMIT Records in Embedded .res File ... | 7     | Note         |

0 **ALERT level A** = Most likely a serious problem - resolve or explain

0 **ALERT level B** = A potentially serious problem, consider carefully

1 **ALERT level C** = Check. Ensure it is not caused by an omission or oversight

41 **ALERT level G** = General information/check it is not something unexpected

4 ALERT type 1 CIF construction/syntax error, inconsistent or missing data  
5 ALERT type 2 Indicator that the structure model may be wrong or deficient  
2 ALERT type 3 Indicator that the structure quality may be low  
31 ALERT type 4 Improvement, methodology, query or suggestion  
0 ALERT type 5 Informative message, check

---

It is advisable to attempt to resolve as many as possible of the alerts in all categories. Often the minor alerts point to easily fixed oversights, errors and omissions in your CIF or refinement strategy, so attention to these fine details can be worthwhile. In order to resolve some of the more serious problems it may be necessary to carry out additional measurements or structure refinements. However, the purpose of your study may justify the reported deviations and the more serious of these should normally be commented upon in the discussion or experimental section of a paper or in the "special\_details" fields of the CIF. checkCIF was carefully designed to identify outliers and unusual parameters, but every test has its limitations and alerts that are not important in a particular case may appear. Conversely, the absence of alerts does not guarantee there are no aspects of the results needing attention. It is up to the individual to critically assess their own results and, if necessary, seek expert advice.

### **Publication of your CIF in IUCr journals**

A basic structural check has been run on your CIF. These basic checks will be run on all CIFs submitted for publication in IUCr journals (*Acta Crystallographica*, *Journal of Applied Crystallography*, *Journal of Synchrotron Radiation*); however, if you intend to submit to *Acta Crystallographica Section C* or *E* or *IUCrData*, you should make sure that full publication checks are run on the final version of your CIF prior to submission.

### **Publication of your CIF in other journals**

Please refer to the *Notes for Authors* of the relevant journal for any special instructions relating to CIF submission.

---

**PLATON version of 27/03/2017; check.def file version of 24/03/2017**

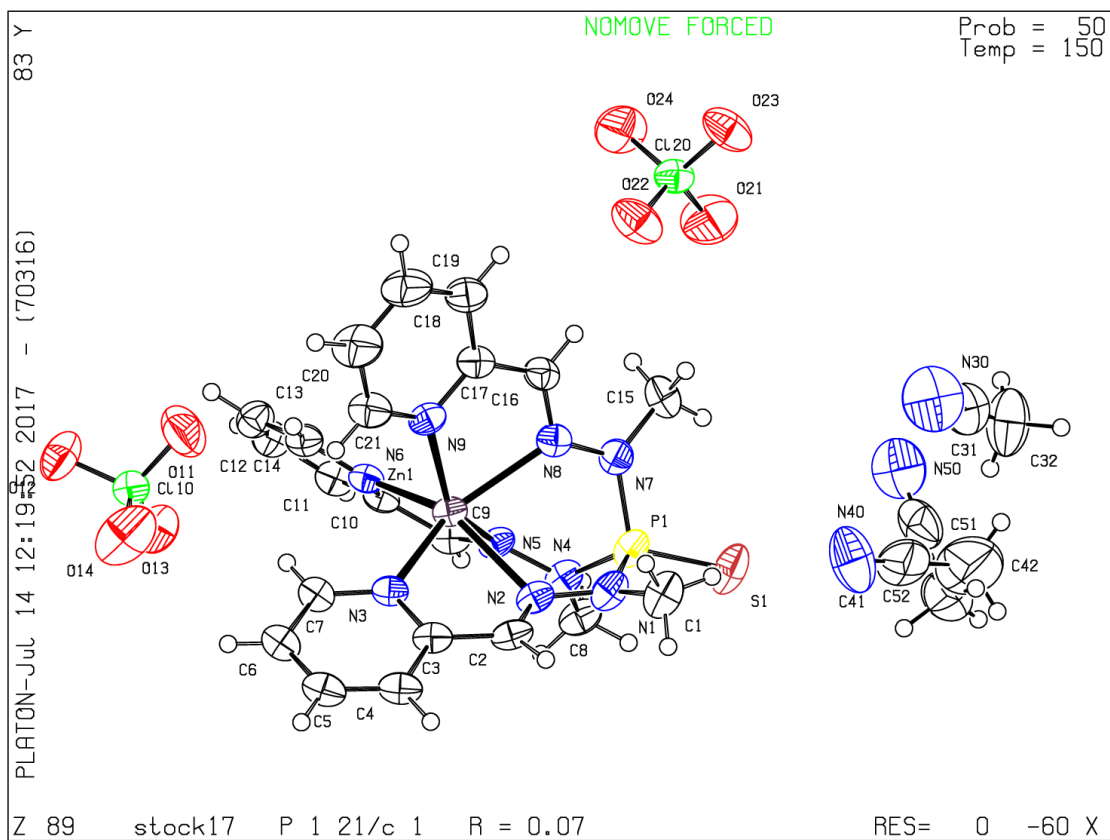

Supplement: s1 [file s1]
