# Supplementary material
Source: MDPI journal article supplement (https://www.mdpi.com/2304-6740/5/3/60)
Supplement: s1 [file s1]

# Supplementary Materials: Structural Dynamics of Spin Crossover in Iron(II) Complexes with Extended-Tripod Ligands

Philipp Stock, Dennis Wiedemann, Holm Petzold and Gerald Hörner

|                                                                                                   |   |
|---------------------------------------------------------------------------------------------------|---|
| DFT-derived structure details of [FeL] <sup>2+</sup> and [Fe(tren)py <sub>3</sub> ] <sup>2+</sup> | 2 |
| Additional plots:                                                                                 |   |
| SCO-energies                                                                                      | 3 |
| VT-UV-Vis spectra                                                                                 | 4 |
| Arrhenius plot                                                                                    | 4 |
| VT-NMR spectra                                                                                    | 5 |
| Curie plot                                                                                        | 6 |
| Cartesian coordinates of optimized structures                                                     | 7 |

---

**Table S1.** Pertinent geometric parameters of DFT-optimized **Is-[FeL]<sup>2+</sup>**.

|                                   | B3LYP                   |             |             |             |             |             | BP86        | PBE         | TPSS0       | TPSSH       |
|-----------------------------------|-------------------------|-------------|-------------|-------------|-------------|-------------|-------------|-------------|-------------|-------------|
|                                   | <i>a</i> <sub>0</sub> = |             |             |             |             |             |             |             |             |             |
|                                   | 0.00                    | 0.05        | 0.10        | 0.15        | 0.20        | 0.25        |             |             |             |             |
| Bond lengths [Å]                  |                         |             |             |             |             |             |             |             |             |             |
| d <sub>Fe-N(ald)</sub>            | 1.935                   | 1.942       | 1.948       | 1.957       | 1.970       | 1.981       | 1.930       | 1.929       | 1.943       | 1.931       |
| d <sub>Fe-N(py)</sub>             | 1.976                   | 1.984       | 1.993       | 2.001       | 2.016       | 2.024       | 1.974       | 1.976       | 1.988       | 1.977       |
| d <sub>Fe-N</sub>                 | 1.955                   | 1.969       | 1.970       | 1.979       | 1.993       | 2.002       | 1.952       | 1.952       | 1.965       | 1.954       |
| distortion                        |                         |             |             |             |             |             |             |             |             |             |
| Σ <sub>cis</sub> / ° <sup>b</sup> | 58.2                    | 59.2        | 59.9        | 61.3        | 64.8        | 68.0        | 57.9        | 58.5        | 59.8        | 59.2        |
| θ / ° <sup>c</sup>                | <b>44.9</b>             | <b>44.4</b> | <b>44.3</b> | <b>43.8</b> | <b>43.4</b> | <b>43.2</b> | <b>45.0</b> | <b>45.0</b> | <b>44.0</b> | <b>44.5</b> |
| S(O <sub>h</sub> ) <sup>d</sup>   | 1.19                    | 1.25        | 1.28        | 1.36        | 1.44        | 1.48        | 1.17        | 1.17        | 1.32        | 1.24        |
| S(TP) <sup>d</sup>                | 9.92                    | 9.76        | 9.71        | 9.50        | 9.31        | 9.28        | 10.01       | 10.01       | 9.57        | 9.77        |

<sup>a</sup> amount of exact exchange; <sup>b</sup> summed deviation from 90° of twelve N-Fe-N cis angles; <sup>c</sup> trigonal distortion; <sup>d</sup> continuous shape measures S(O<sub>h</sub>) and S(TP) with reference to the octahedron and the trigonal prism, respectively.

**Table S2.** Pertinent geometric parameters of DFT-optimized **Is-[Fe(tren)py<sub>3</sub>]<sup>2+</sup>**.

|                                   | B3LYP                                |             |             |             |             | Exp. <sup>b</sup> |
|-----------------------------------|--------------------------------------|-------------|-------------|-------------|-------------|-------------------|
|                                   | <i>a</i> <sub>0</sub> <sup>a</sup> = |             |             |             |             |                   |
|                                   | 0.00                                 | 0.05        | 0.10        | 0.15        | 0.20        |                   |
| distances [Å]                     |                                      |             |             |             |             |                   |
| d <sub>Fe-N(ald)</sub>            | 1.942                                | 1.952       | 1.965       | 1.977       | 1.995       | 1.942             |
| d <sub>Fe-N(py)</sub>             | 1.981                                | 1.990       | 1.998       | 2.009       | 2.021       | 1.967             |
| d <sub>Fe-N</sub>                 | 1.961                                | 1.971       | 1.981       | 1.993       | 2.008       | 1.955             |
| d <sub>Fe-N7</sub>                | 3.530                                | 3.511       | 3.490       | 3.469       | 3.441       | 3.439             |
| distortion                        |                                      |             |             |             |             |                   |
| Σ <sub>cis</sub> / ° <sup>c</sup> | 60.8                                 | 61.6        | 61.9        | 62.2        | 62.9        | -                 |
| θ / ° <sup>d</sup>                | <b>54.1</b>                          | <b>54.0</b> | <b>53.7</b> | <b>53.5</b> | <b>53.1</b> | <b>53.97</b>      |
| S(O <sub>h</sub> ) <sup>e</sup>   | 0.60                                 | 0.62        | 0.64        | 0.67        | 0.71        | -                 |
| S(TP) <sup>e</sup>                | 15.08                                | 14.99       | 14.90       | 14.76       | 14.62       | -                 |

<sup>a</sup> amount of exact exchange; <sup>b</sup> Cation in **[Fe(tren)py<sub>3</sub>](BF<sub>4</sub>)<sub>2</sub>**, data taken from Ref. [53] in the manuscript; <sup>c</sup> summed deviation from 90° of twelve N-Fe-N cis angles; <sup>d</sup> trigonal distortion; <sup>e</sup> continuous shape measures S(O<sub>h</sub>) and S(TP) with reference to the octahedron and the trigonal prism, respectively.

**Table S3.** Pertinent geometric parameters of DFT-optimized **hs-[Fe(tren)py<sub>3</sub>]<sup>2+</sup>**.

|                                  | B3LYP     |       |       |       |       | BP86                                     | Exp. <sup>b</sup>                        |
|----------------------------------|-----------|-------|-------|-------|-------|------------------------------------------|------------------------------------------|
|                                  | $a_0^a =$ |       |       |       |       | [Zn(tren)py <sub>3</sub> ] <sup>2+</sup> | [Zn(tren)py <sub>3</sub> ] <sup>2+</sup> |
|                                  | 0.00      | 0.05  | 0.10  | 0.15  | 0.20  |                                          |                                          |
| distances [Å]                    |           |       |       |       |       |                                          |                                          |
| d <sub>Fe-N(ald)</sub>           | 2.118     | 2.133 | 2.147 | 2.161 | 2.173 | 2.158                                    | 2.128                                    |
| d <sub>Fe-N(py)</sub>            | 2.252     | 2.256 | 2.257 | 2.261 | 2.265 | 2.244                                    | 2.226                                    |
| d <sub>Fe-N</sub>                | 2.185     | 2.195 | 2.202 | 2.211 | 2.219 | 2.201                                    | 2.180                                    |
| d <sub>Fe-N7</sub>               | 2.800     | 2.795 | 2.834 | 2.876 | 2.923 | 3.053                                    | 3.013                                    |
| distortion                       |           |       |       |       |       |                                          |                                          |
| $\Sigma_{\text{cis}} / ^\circ^c$ | 112.7     | 111.8 | 109.4 | 108.3 | 109.9 | 92.4                                     | -                                        |
| $\theta / ^\circ^d$              | 47.5      | 47.5  | 47.2  | 46.8  | 46.3  | 46.3                                     | 45.9                                     |
| S(O <sub>h</sub> ) <sup>e</sup>  | 2.07      | 2.12  | 2.12  | 2.13  | 2.15  | 1.74                                     | -                                        |
| S(TP) <sup>e</sup>               | 12.71     | 12.79 | 12.62 | 12.40 | 12.15 | 11.66                                    | -                                        |

<sup>a</sup> amount of exact exchange; <sup>b</sup> Cation in [Zn(tren)py<sub>3</sub>](BF<sub>4</sub>)<sub>2</sub>, data taken from Ref. [53] in the manuscript; <sup>c</sup> summed deviation from 90° of twelve N-Fe-N cis angles; <sup>d</sup> trigonal distortion; <sup>e</sup> continuous shape measures S(O<sub>h</sub>) and S(TP) with reference to the octahedron and the trigonal prism, respectively.

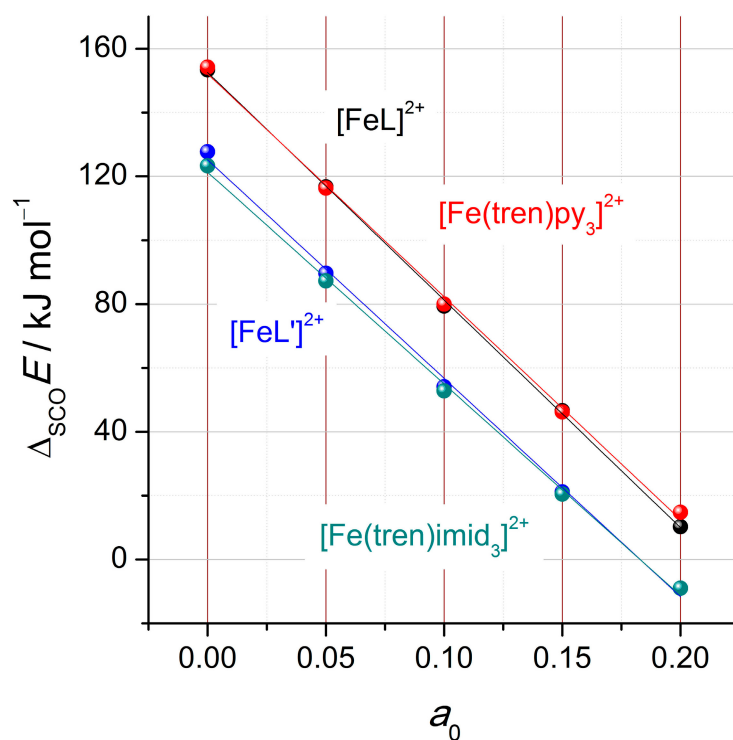**Figure S1.** Dependence of DFT-derived apparent SCO energies  $\Delta_{\text{SCO}}E$  on exact exchange  $a_0$ ; symbols: computed energies; lines: linear regressions.

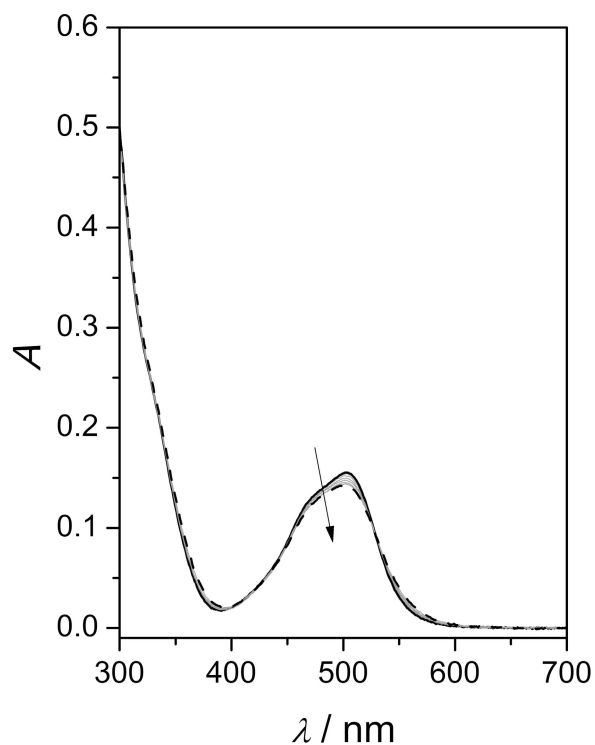

**Figure S2.** VT-UV-Vis spectra of  $[\text{FeL}](\text{BF}_4)_2$  in MeCN between  $273 \text{ K} < T < 350 \text{ K}$ ; arrow denotes the MLCT intensity loss with increasing temperature (effects of volume density have been accounted for).

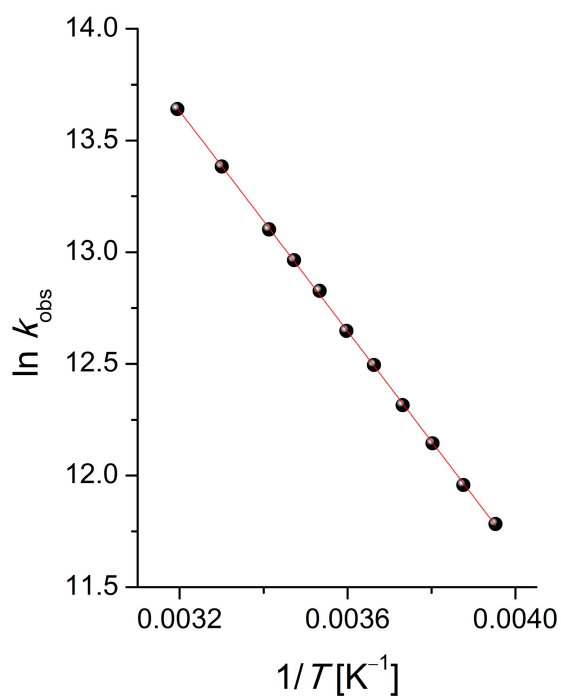

**Figure S3.** Arrhenius plot of transient decay rate constants of  $[\text{FeL}]^{2+}$  in MeCN; symbols: experimental data; line: linear fit with  $E_a = \text{'slope'} \times R = 22.2(3) \text{ kJ mol}^{-1}$  and  $A_0 = \exp(\text{'intercept'}) = 2.9(2) \times 10^9 \text{ s}^{-1}$  ( $R^2 = 0.9998$ )

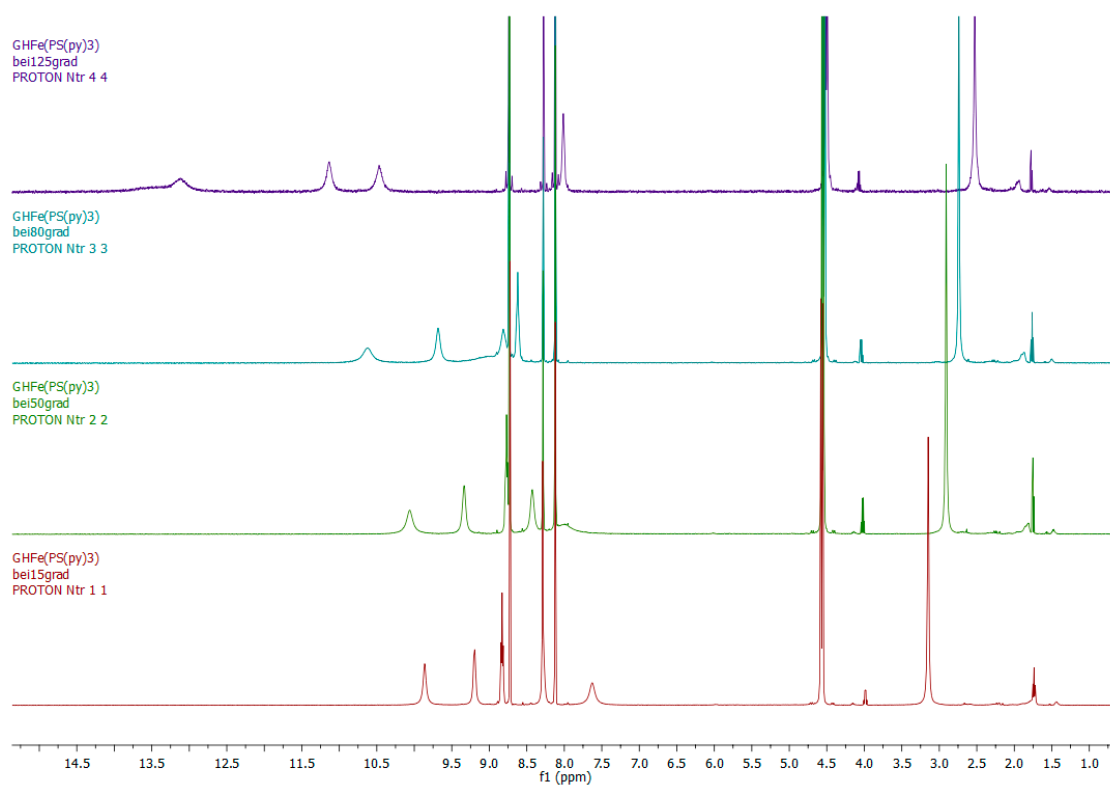

Figure S4. VT-<sup>1</sup>H NMR spectra of **[FeL](BF<sub>4</sub>)<sub>2</sub>** (500 MHz; [D<sub>5</sub>]nitrobenzene).

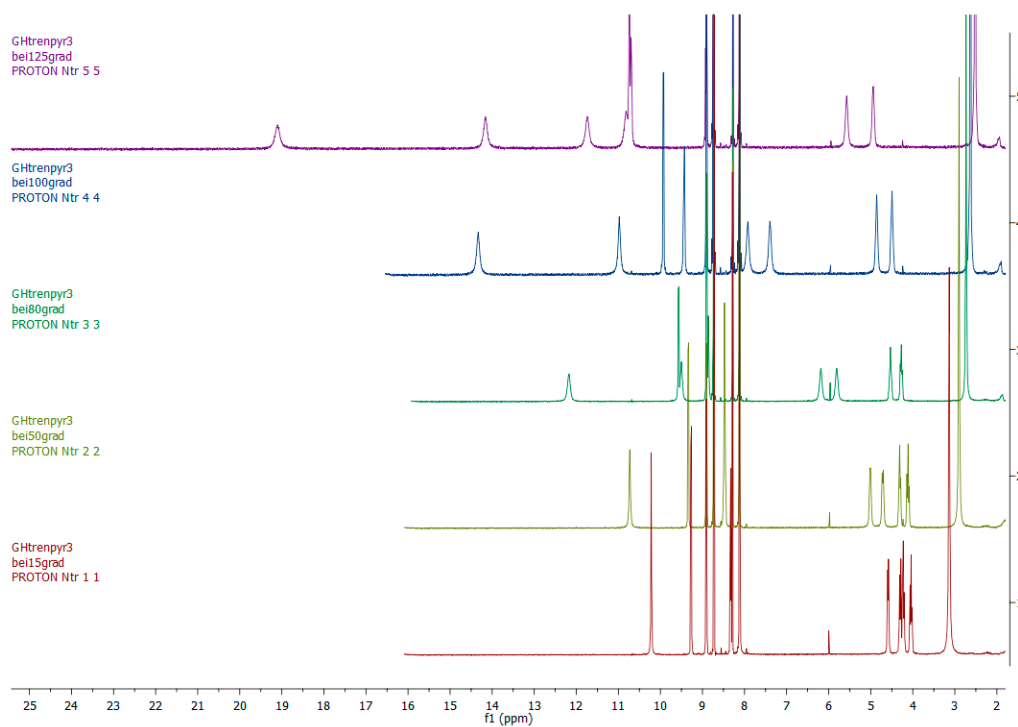

Figure S5. VT-<sup>1</sup>H NMR spectra of **[Fe(tren)py<sub>3</sub>](ClO<sub>4</sub>)<sub>2</sub>** (500 MHz; [D<sub>5</sub>]nitrobenzene).

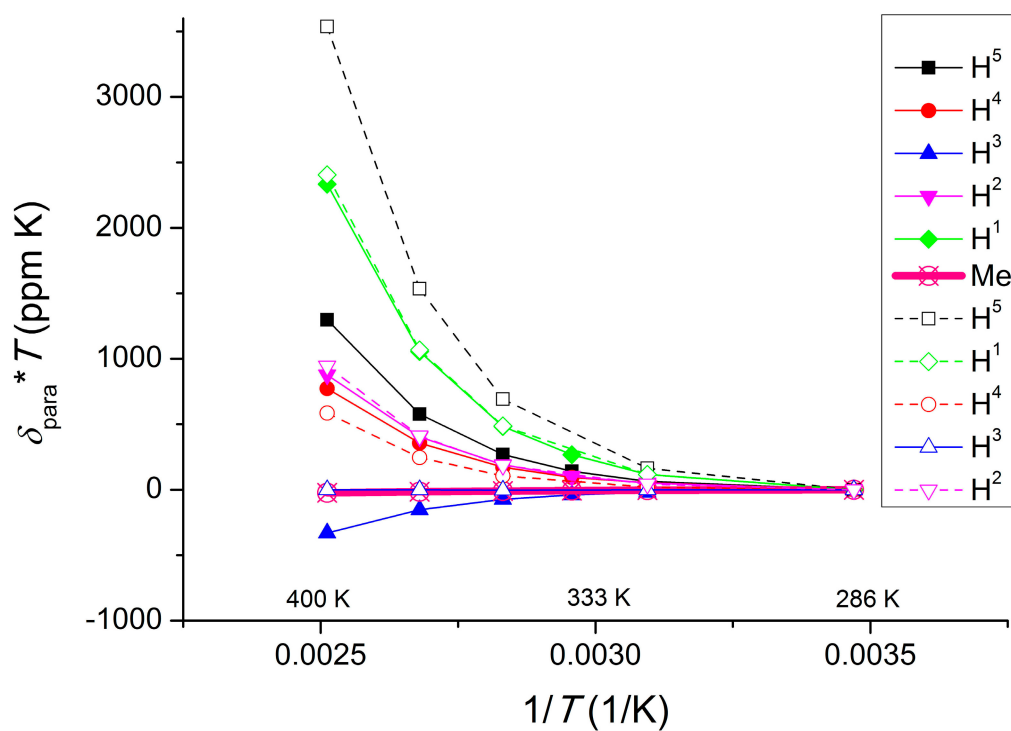

**Figure S6.** Curie plot of the proton chemical shifts in NMR spectra of  $[\text{Fe}(\text{tren})\text{py}_3](\text{ClO}_4)_2$  (open symbols) and  $[\text{FeL}](\text{BF}_4)_2$  (filled symbols) (500 MHz;  $[\text{D}_5]\text{nitrobenzene}$ ); for proton assignment, see Scheme 1 in the Manuscript.

**Table S4.** Cartesian coordinates of DFT-optimized  $\text{ls-[FeL]}^{2+}$  (B3LYP\*-D/TZVPP).

|    |           |           |           |
|----|-----------|-----------|-----------|
| C  | 2.193278  | -1.271660 | -3.308945 |
| C  | 2.884631  | -2.409438 | -2.910318 |
| C  | -0.221419 | 3.258077  | -2.903877 |
| C  | 0.782202  | 0.680919  | -2.655366 |
| C  | 1.446745  | -0.570524 | -2.365997 |
| C  | 2.809087  | -2.807293 | -1.578572 |
| C  | -2.492531 | -3.140544 | -1.444357 |
| C  | -3.712580 | -2.782219 | -0.877496 |
| C  | 2.034720  | -2.066365 | -0.692886 |
| C  | -1.399752 | -2.294597 | -1.291090 |
| C  | -3.802535 | -1.578296 | -0.189044 |
| C  | -2.670109 | -0.774694 | -0.083386 |
| C  | -2.684138 | 0.538611  | 0.521527  |
| C  | -2.586124 | 3.201262  | 1.301727  |
| C  | 2.231519  | 3.490222  | 1.243390  |
| C  | -0.218904 | -2.144179 | 1.985869  |
| C  | 1.800130  | 0.837152  | 1.937622  |
| C  | 1.358324  | -0.479355 | 2.341445  |
| C  | 0.243059  | -2.866370 | 3.080179  |
| C  | 1.879398  | -1.155992 | 3.441472  |
| C  | 1.315165  | -2.369751 | 3.816100  |
| H  | 2.232685  | -0.918398 | -4.332036 |
| H  | 3.475626  | -2.971667 | -3.623249 |
| H  | -0.754394 | 2.726714  | -3.695867 |
| H  | 0.915779  | 1.178958  | -3.607542 |
| H  | 0.828576  | 3.393752  | -3.187709 |
| H  | -0.682906 | 4.229723  | -2.746999 |
| H  | 3.339893  | -3.680496 | -1.221558 |
| H  | -2.379730 | -4.063106 | -1.999135 |
| H  | -4.578923 | -3.425351 | -0.975539 |
| H  | -0.436716 | -2.551958 | -1.709643 |
| H  | -4.734186 | -1.253475 | 0.257574  |
| H  | 1.946122  | -2.358366 | 0.344546  |
| H  | -3.359701 | 3.224315  | 0.525015  |
| H  | -3.610864 | 1.001499  | 0.836207  |
| H  | 2.222103  | 4.475319  | 0.783801  |
| H  | 3.235313  | 3.064079  | 1.166740  |
| H  | -2.289468 | 4.217333  | 1.549702  |
| H  | -1.043379 | -2.511048 | 1.389068  |
| H  | -2.973585 | 2.709280  | 2.196995  |
| H  | 1.943419  | 3.576602  | 2.298182  |
| H  | 2.503079  | 1.401480  | 2.537163  |
| H  | -0.235163 | -3.800657 | 3.344344  |
| H  | 2.706033  | -0.725257 | 3.993060  |
| H  | 1.699871  | -2.913729 | 4.670171  |
| N  | -0.346398 | 2.476256  | -1.668346 |
| N  | 0.136398  | 1.200305  | -1.658766 |
| N  | 1.358786  | -0.972475 | -1.066008 |
| N  | -1.471284 | -1.136389 | -0.622672 |
| N  | -1.537779 | 1.143365  | 0.540730  |
| N  | -1.398687 | 2.463460  | 0.855667  |
| N  | 1.310075  | 2.620069  | 0.504244  |
| N  | 1.201407  | 1.317175  | 0.892470  |
| N  | 0.321639  | -0.978174 | 1.609161  |
| P  | -0.189639 | 3.264894  | -0.117451 |
| S  | -0.303870 | 5.169435  | -0.155653 |
| Fe | 0.001414  | 0.090923  | -0.050540 |

**Table S5.** Cartesian coordinates of DFT-optimized **hs-[FeL]<sup>2+</sup>** (B3LYP\*-D/TZVPP).

|    |           |           |           |
|----|-----------|-----------|-----------|
| C  | 2.286655  | -1.177572 | -3.569293 |
| C  | 2.790818  | -2.458544 | -3.373377 |
| C  | 0.198710  | 3.421297  | -2.877184 |
| C  | 1.091742  | 0.803664  | -2.671289 |
| C  | 1.564877  | -0.570373 | -2.543924 |
| C  | 2.560280  | -3.093521 | -2.157070 |
| C  | -2.822535 | -3.390828 | -0.958056 |
| C  | -4.049959 | -2.818428 | -0.638269 |
| C  | 1.812396  | -2.428854 | -1.190810 |
| C  | -1.676375 | -2.610730 | -0.848750 |
| C  | -4.087658 | -1.488087 | -0.234479 |
| C  | -2.896134 | -0.770789 | -0.156325 |
| C  | -2.886729 | 0.640378  | 0.207463  |
| C  | -2.801440 | 3.318362  | 0.924731  |
| C  | 2.004235  | 3.645739  | 1.609405  |
| C  | 0.374204  | -2.405197 | 2.039103  |
| C  | 1.649770  | 0.977687  | 2.282214  |
| C  | 1.449541  | -0.432287 | 2.593749  |
| C  | 0.891367  | -3.056110 | 3.154214  |
| C  | 2.020134  | -1.018086 | 3.721446  |
| C  | 1.736399  | -2.349994 | 4.005390  |
| H  | 2.459018  | -0.643663 | -4.496009 |
| H  | 3.360984  | -2.948273 | -4.153732 |
| H  | -0.375315 | 2.897014  | -3.647088 |
| H  | 1.237489  | 1.317772  | -3.615577 |
| H  | 1.236179  | 3.537524  | -3.208072 |
| H  | -0.233430 | 4.402747  | -2.702897 |
| H  | 2.945242  | -4.084898 | -1.956551 |
| H  | -2.748470 | -4.418810 | -1.288001 |
| H  | -4.964394 | -3.395369 | -0.708780 |
| H  | -0.702511 | -3.015933 | -1.094961 |
| H  | -5.024990 | -1.003208 | 0.010360  |
| H  | 1.605511  | -2.890419 | -0.232270 |
| H  | -3.582479 | 3.352664  | 0.157337  |
| H  | -3.824197 | 1.122081  | 0.464006  |
| H  | 1.975973  | 4.626089  | 1.141650  |
| H  | 3.005835  | 3.216305  | 1.504792  |
| H  | -2.499026 | 4.331586  | 1.175050  |
| H  | -0.285811 | -2.917919 | 1.349716  |
| H  | -3.186792 | 2.819209  | 1.818687  |
| H  | 1.756343  | 3.746309  | 2.671993  |
| H  | 2.320968  | 1.564815  | 2.899969  |
| H  | 0.635448  | -4.090412 | 3.344556  |
| H  | 2.661517  | -0.431189 | 4.368079  |
| H  | 2.161728  | -2.825644 | 4.880856  |
| N  | 0.142841  | 2.642097  | -1.636419 |
| N  | 0.566384  | 1.361628  | -1.631813 |
| N  | 1.312138  | -1.203700 | -1.374739 |
| N  | -1.700184 | -1.335413 | -0.448611 |
| N  | -1.755258 | 1.257923  | 0.162792  |
| N  | -1.635445 | 2.571434  | 0.440589  |
| N  | 1.044358  | 2.761760  | 0.940080  |
| N  | 0.969550  | 1.466715  | 1.300686  |
| N  | 0.648432  | -1.128558 | 1.753651  |
| P  | -0.197298 | 3.370908  | -0.102761 |
| S  | -0.323319 | 5.281064  | -0.146624 |
| Fe | 0.024388  | -0.072609 | -0.034711 |

**Table S6.** Cartesian coordinates of DFT-optimized [ZnL]<sup>2+</sup> (B3LYP\*-D/TZVPP).

|    |           |           |           |
|----|-----------|-----------|-----------|
| C  | 2.362389  | -1.119418 | -3.537243 |
| C  | 2.854169  | -2.404001 | -3.335708 |
| C  | 0.230482  | 3.487365  | -2.873735 |
| C  | 1.137730  | 0.860463  | -2.670755 |
| C  | 1.618496  | -0.511000 | -2.528091 |
| C  | 2.600029  | -3.041385 | -2.125023 |
| C  | -2.825518 | -3.424046 | -0.897426 |
| C  | -4.052120 | -2.838691 | -0.598054 |
| C  | 1.842693  | -2.373022 | -1.170776 |
| C  | -1.677768 | -2.644578 | -0.810314 |
| C  | -4.085707 | -1.498004 | -0.231994 |
| C  | -2.890833 | -0.783719 | -0.162886 |
| C  | -2.880968 | 0.634307  | 0.184029  |
| C  | -2.828853 | 3.322389  | 0.853149  |
| C  | 2.025269  | 3.594051  | 1.569878  |
| C  | 0.292600  | -2.449779 | 2.065068  |
| C  | 1.620880  | 0.924761  | 2.239126  |
| C  | 1.400734  | -0.481521 | 2.563108  |
| C  | 0.808268  | -3.084774 | 3.189968  |
| C  | 1.969802  | -1.052906 | 3.699907  |
| C  | 1.671577  | -2.372923 | 4.016815  |
| H  | 2.557832  | -0.584677 | -4.458857 |
| H  | 3.434617  | -2.895376 | -4.107264 |
| H  | -0.303979 | 2.980006  | -3.681708 |
| H  | 1.320986  | 1.379654  | -3.606073 |
| H  | 1.279340  | 3.625745  | -3.156131 |
| H  | -0.223305 | 4.457813  | -2.690688 |
| H  | 2.976200  | -4.035000 | -1.919540 |
| H  | -2.754411 | -4.461204 | -1.198498 |
| H  | -4.968026 | -3.414567 | -0.656332 |
| H  | -0.704463 | -3.058668 | -1.046924 |
| H  | -5.022331 | -1.003481 | -0.004552 |
| H  | 1.622054  | -2.830782 | -0.213364 |
| H  | -3.587626 | 3.329800  | 0.062787  |
| H  | -3.821408 | 1.107128  | 0.446623  |
| H  | 2.015884  | 4.570994  | 1.094590  |
| H  | 3.016383  | 3.143642  | 1.459162  |
| H  | -2.540596 | 4.343929  | 1.084942  |
| H  | -0.381972 | -2.970325 | 1.396310  |
| H  | -3.237636 | 2.846730  | 1.749048  |
| H  | 1.786352  | 3.709678  | 2.632769  |
| H  | 2.298632  | 1.499614  | 2.861741  |
| H  | 0.534389  | -4.109036 | 3.407665  |
| H  | 2.620793  | -0.460016 | 4.330829  |
| H  | 2.099619  | -2.834971 | 4.898252  |
| N  | 0.125240  | 2.674206  | -1.657238 |
| N  | 0.563957  | 1.402566  | -1.654276 |
| N  | 1.351716  | -1.144966 | -1.364722 |
| N  | -1.700775 | -1.361041 | -0.437777 |
| N  | -1.757123 | 1.260991  | 0.132325  |
| N  | -1.644828 | 2.572494  | 0.419042  |
| N  | 1.042410  | 2.726938  | 0.911745  |
| N  | 0.950121  | 1.430433  | 1.262609  |
| N  | 0.588186  | -1.186244 | 1.744872  |
| P  | -0.199460 | 3.372184  | -0.105251 |
| S  | -0.299440 | 5.285328  | -0.102565 |
| Zn | 0.011031  | -0.133733 | -0.048471 |

**Table S7.** Cartesian coordinates of DFT-optimized **ls-[Fe(tren)py<sub>3</sub>]<sup>2+</sup>** (B3LYP\*-D/TZVPP).

|    |            |           |           |
|----|------------|-----------|-----------|
| Fe | -5.241944  | 2.663158  | 3.567574  |
| N  | -6.384012  | 4.019024  | 4.430049  |
| N  | -6.991966  | 2.221404  | 2.683666  |
| N  | -5.636811  | 1.229343  | 4.880700  |
| N  | -4.274586  | 1.140046  | 2.684776  |
| N  | -3.536819  | 3.269045  | 4.366075  |
| N  | -4.701984  | 4.016114  | 2.185527  |
| N  | -4.991981  | 3.272514  | 6.973181  |
| C  | -7.622693  | 4.004517  | 4.080965  |
| C  | -8.028930  | 2.981441  | 3.134916  |
| C  | -9.339197  | 2.777452  | 2.711706  |
| C  | -9.598818  | 1.762092  | 1.793170  |
| C  | -8.536192  | 0.994876  | 1.324736  |
| C  | -7.250393  | 1.254763  | 1.793746  |
| C  | -5.231540  | 0.056316  | 4.541851  |
| C  | -4.447747  | -0.049465 | 3.326206  |
| C  | -3.916610  | -1.240325 | 2.841602  |
| C  | -3.170118  | -1.214798 | 1.665811  |
| C  | -2.971690  | 0.005214  | 1.025419  |
| C  | -3.540686  | 1.157602  | 1.564936  |
| C  | -2.888619  | 4.141557  | 3.677320  |
| C  | -3.511776  | 4.620851  | 2.458421  |
| C  | -2.962170  | 5.591091  | 1.626409  |
| C  | -3.654290  | 5.960427  | 0.475708  |
| C  | -4.876620  | 5.351389  | 0.205662  |
| C  | -5.364049  | 4.383089  | 1.081199  |
| C  | -5.920790  | 5.010552  | 5.393655  |
| C  | -5.830911  | 4.428388  | 6.826753  |
| C  | -6.415830  | 1.386504  | 6.103571  |
| C  | -5.576076  | 1.989656  | 7.252321  |
| C  | -2.947009  | 2.753827  | 5.596148  |
| C  | -3.566656  | 3.397918  | 6.858750  |
| H  | -8.343383  | 4.727966  | 4.463213  |
| H  | -10.134741 | 3.404395  | 3.099802  |
| H  | -10.609266 | 1.573468  | 1.447390  |
| H  | -8.692847  | 0.200981  | 0.603441  |
| H  | -6.402272  | 0.676666  | 1.449911  |
| H  | -5.464334  | -0.831263 | 5.131003  |
| H  | -4.092010  | -2.165930 | 3.379509  |
| H  | -2.746102  | -2.127473 | 1.261660  |
| H  | -2.389884  | 0.071960  | 0.113585  |
| H  | -3.414231  | 2.121170  | 1.087584  |
| H  | -1.907531  | 4.508887  | 3.978924  |
| H  | -2.009370  | 6.042458  | 1.880326  |
| H  | -3.249619  | 6.711289  | -0.194077 |
| H  | -5.450215  | 5.613080  | -0.675937 |
| H  | -6.306129  | 3.882313  | 0.897369  |
| H  | -6.592404  | 5.876545  | 5.412034  |
| H  | -4.931398  | 5.343583  | 5.076787  |
| H  | -5.482472  | 5.252495  | 7.465143  |
| H  | -6.840557  | 4.169487  | 7.161286  |
| H  | -6.820097  | 0.422439  | 6.433806  |
| H  | -7.251072  | 2.053746  | 5.882108  |
| H  | -6.244379  | 2.036750  | 8.124243  |
| H  | -4.773263  | 1.289884  | 7.504361  |
| H  | -1.865449  | 2.936575  | 5.609811  |
| H  | -3.123024  | 1.675997  | 5.619102  |
| H  | -3.059216  | 2.930370  | 7.714888  |
| H  | -3.306437  | 4.461273  | 6.873908  |

**Table S8.** Cartesian coordinates of DFT-optimized **hs-[Fe(tren)py<sub>3</sub>]<sup>2+</sup>** (B3LYP\*-D/TZVPP).

|    |            |           |           |
|----|------------|-----------|-----------|
| Fe | -5.154130  | 2.721159  | 3.808125  |
| N  | -6.614343  | 4.115147  | 4.525715  |
| N  | -7.060448  | 2.261191  | 2.654503  |
| N  | -5.636058  | 0.991531  | 5.017449  |
| N  | -4.271215  | 0.960408  | 2.735508  |
| N  | -3.238712  | 3.534206  | 4.445840  |
| N  | -4.492995  | 4.108397  | 2.145327  |
| N  | -4.977506  | 3.234392  | 6.632835  |
| C  | -7.808645  | 4.023165  | 4.079416  |
| C  | -8.113718  | 3.004866  | 3.074492  |
| C  | -9.409221  | 2.798279  | 2.604008  |
| C  | -9.631157  | 1.793679  | 1.663962  |
| C  | -8.546827  | 1.043763  | 1.218851  |
| C  | -7.281875  | 1.312801  | 1.740145  |
| C  | -5.358496  | -0.158787 | 4.539117  |
| C  | -4.624343  | -0.232240 | 3.272899  |
| C  | -4.276531  | -1.444860 | 2.685583  |
| C  | -3.528105  | -1.429670 | 1.509096  |
| C  | -3.152161  | -0.204743 | 0.967321  |
| C  | -3.551644  | 0.967049  | 1.611382  |
| C  | -2.662160  | 4.357020  | 3.660525  |
| C  | -3.312053  | 4.721269  | 2.395462  |
| C  | -2.758273  | 5.660459  | 1.531931  |
| C  | -3.446251  | 5.983112  | 0.361603  |
| C  | -4.662024  | 5.359136  | 0.107980  |
| C  | -5.145655  | 4.423923  | 1.026805  |
| C  | -6.296637  | 5.044800  | 5.603336  |
| C  | -6.026458  | 4.225448  | 6.872539  |
| C  | -6.224226  | 1.129102  | 6.340072  |
| C  | -5.245746  | 1.920571  | 7.217242  |
| C  | -2.672634  | 3.207484  | 5.747261  |
| C  | -3.617379  | 3.733782  | 6.834328  |
| H  | -8.615598  | 4.668967  | 4.436641  |
| H  | -10.223304 | 3.412645  | 2.974342  |
| H  | -10.628682 | 1.600671  | 1.284393  |
| H  | -8.671604  | 0.259205  | 0.481062  |
| H  | -6.418094  | 0.744870  | 1.414215  |
| H  | -5.617275  | -1.088637 | 5.053074  |
| H  | -4.584822  | -2.378129 | 3.145078  |
| H  | -3.237186  | -2.358066 | 1.029654  |
| H  | -2.562586  | -0.149661 | 0.059534  |
| H  | -3.291749  | 1.942011  | 1.213370  |
| H  | -1.700850  | 4.819660  | 3.903118  |
| H  | -1.810304  | 6.129255  | 1.773333  |
| H  | -3.041024  | 6.712038  | -0.331840 |
| H  | -5.233100  | 5.585304  | -0.785121 |
| H  | -6.087560  | 3.911914  | 0.862654  |
| H  | -7.105625  | 5.764004  | 5.778596  |
| H  | -5.393351  | 5.595911  | 5.319369  |
| H  | -5.773345  | 4.903886  | 7.698902  |
| H  | -6.947854  | 3.706218  | 7.150480  |
| H  | -6.447375  | 0.157379  | 6.797047  |
| H  | -7.159602  | 1.689155  | 6.239359  |
| H  | -5.654851  | 1.993244  | 8.236130  |
| H  | -4.305449  | 1.365532  | 7.277751  |
| H  | -1.670600  | 3.634498  | 5.879139  |
| H  | -2.602006  | 2.116406  | 5.814366  |
| H  | -3.214960  | 3.464267  | 7.821756  |
| H  | -3.634833  | 4.826307  | 6.776654  |

**Table S9.** Cartesian coordinates of DFT-optimized [Zn(tren)py<sub>3</sub>]<sup>2+</sup> (B3LYP\*-D/TZVPP).

|    |           |          |          |
|----|-----------|----------|----------|
| Zn | -5.23310  | 2.68063  | 3.78940  |
| N  | -6.64694  | 4.09422  | 4.59891  |
| N  | -7.14351  | 2.27161  | 2.66773  |
| N  | -5.52954  | 0.97326  | 5.07827  |
| N  | -4.28590  | 0.97830  | 2.68181  |
| N  | -3.33618  | 3.46674  | 4.45388  |
| N  | -4.60235  | 4.06046  | 2.14342  |
| N  | -4.99857  | 3.22739  | 6.78406  |
| C  | -7.81934  | 4.08357  | 4.08298  |
| C  | -8.14795  | 3.10417  | 3.03874  |
| C  | -9.42445  | 3.03351  | 2.47401  |
| C  | -9.67259  | 2.06734  | 1.49380  |
| C  | -8.63819  | 1.21101  | 1.11540  |
| C  | -7.38638  | 1.35078  | 1.72918  |
| C  | -5.12929  | -0.15321 | 4.61850  |
| C  | -4.44153  | -0.20723 | 3.32185  |
| C  | -3.96537  | -1.40930 | 2.79217  |
| C  | -3.30202  | -1.38530 | 1.56125  |
| C  | -3.13738  | -0.16313 | 0.90863  |
| C  | -3.64964  | 0.99593  | 1.50591  |
| C  | -2.74072  | 4.25628  | 3.63966  |
| C  | -3.38945  | 4.62147  | 2.37326  |
| C  | -2.79325  | 5.50617  | 1.47118  |
| C  | -3.47574  | 5.82641  | 0.29351  |
| C  | -4.72587  | 5.25222  | 0.06288  |
| C  | -5.25062  | 4.36950  | 1.01582  |
| C  | -6.31671  | 5.00522  | 5.68388  |
| C  | -6.06334  | 4.19780  | 6.97188  |
| C  | -6.14213  | 1.07146  | 6.39346  |
| C  | -5.23093  | 1.89798  | 7.32261  |
| C  | -2.75457  | 3.14753  | 5.74822  |
| C  | -3.63885  | 3.73301  | 6.86669  |
| H  | -8.60547  | 4.78517  | 4.40243  |
| H  | -10.20549 | 3.72230  | 2.80057  |
| H  | -10.65911 | 1.98443  | 1.03613  |
| H  | -8.79012  | 0.44438  | 0.35511  |
| H  | -6.54822  | 0.70524  | 1.45932  |
| H  | -5.27245  | -1.09499 | 5.17024  |
| H  | -4.11215  | -2.34291 | 3.33782  |
| H  | -2.91722  | -2.30678 | 1.12290  |
| H  | -2.62430  | -0.10046 | -0.05095 |
| H  | -3.55099  | 1.97175  | 1.02708  |
| H  | -1.75191  | 4.68668  | 3.85993  |
| H  | -1.81489  | 5.93509  | 1.69311  |
| H  | -3.03876  | 6.51705  | -0.42907 |
| H  | -5.29204  | 5.47785  | -0.84099 |
| H  | -6.22153  | 3.89193  | 0.87308  |
| H  | -7.11294  | 5.74987  | 5.85491  |
| H  | -5.38980  | 5.53396  | 5.40678  |
| H  | -5.85385  | 4.91086  | 7.79251  |
| H  | -6.98816  | 3.66309  | 7.23585  |
| H  | -6.33464  | 0.07883  | 6.83492  |
| H  | -7.10257  | 1.59911  | 6.27762  |
| H  | -5.68998  | 1.91703  | 8.33045  |
| H  | -4.26483  | 1.37967  | 7.41572  |
| H  | -1.72341  | 3.52934  | 5.84297  |
| H  | -2.73582  | 2.04994  | 5.84602  |
| H  | -3.15679  | 3.51263  | 7.83996  |
| H  | -3.66137  | 4.82782  | 6.75635  |
